# Supplementary material for: Barbamide Displays Affinity for Membrane-Bound Receptors and Impacts Store-Operated Calcium Entry in Mouse Sensory Neurons
Source: MDPI journal article supplement (doi:10.3390/md21020110), 2023-02-02
Supplement: s1 [file s1]

**Title:** Barbamide binds to kappa opioid receptors and enhances store-operated calcium entry in mouse sensory neurons.

**Authors:** Andrea Hough<sup>1</sup>, Connor Criswell<sup>2</sup>, Asef Faruk,<sup>1</sup> Jane E. Cavanaugh,<sup>1</sup> Benedict Kolber<sup>2,\*\*</sup>, Kevin Tidgewell<sup>1,\*\*</sup>

<sup>1</sup>Duquesne University, Division of Medicinal Chemistry, Pittsburgh, PA 15282; <sup>2</sup>University of Texas at Dallas, Department of Neuroscience, Center for Advanced Pain Studies Richardson, TX 75080;

#### Contents of Supporting Information

| <b>Contents</b>                                                                                         | <b>page</b> |
|---------------------------------------------------------------------------------------------------------|-------------|
| <b>Figure S1.</b> <sup>1</sup> H NMR spectrum of barbamide ( <b>1</b> ) in CDCl <sub>3</sub> at 500 MHz | <b>2</b>    |
| <b>Figure S2.</b> <sup>13</sup> C spectrum of barbamide ( <b>1</b> ) in CDCl <sub>3</sub> at 500 MHz    | <b>3</b>    |
| <b>Figure S3.</b> COSY spectrum of barbamide ( <b>1</b> ) in CDCl <sub>3</sub> at 500 MHz               | <b>4</b>    |
| <b>Figure S4.</b> HSQC spectrum of barbamide ( <b>1</b> ) in CDCl <sub>3</sub> at 500 MHz               | <b>5</b>    |
| <b>Figure S5.</b> HMBC spectrum of barbamide ( <b>1</b> ) in CDCl <sub>3</sub> at 500 MHz               | <b>6</b>    |

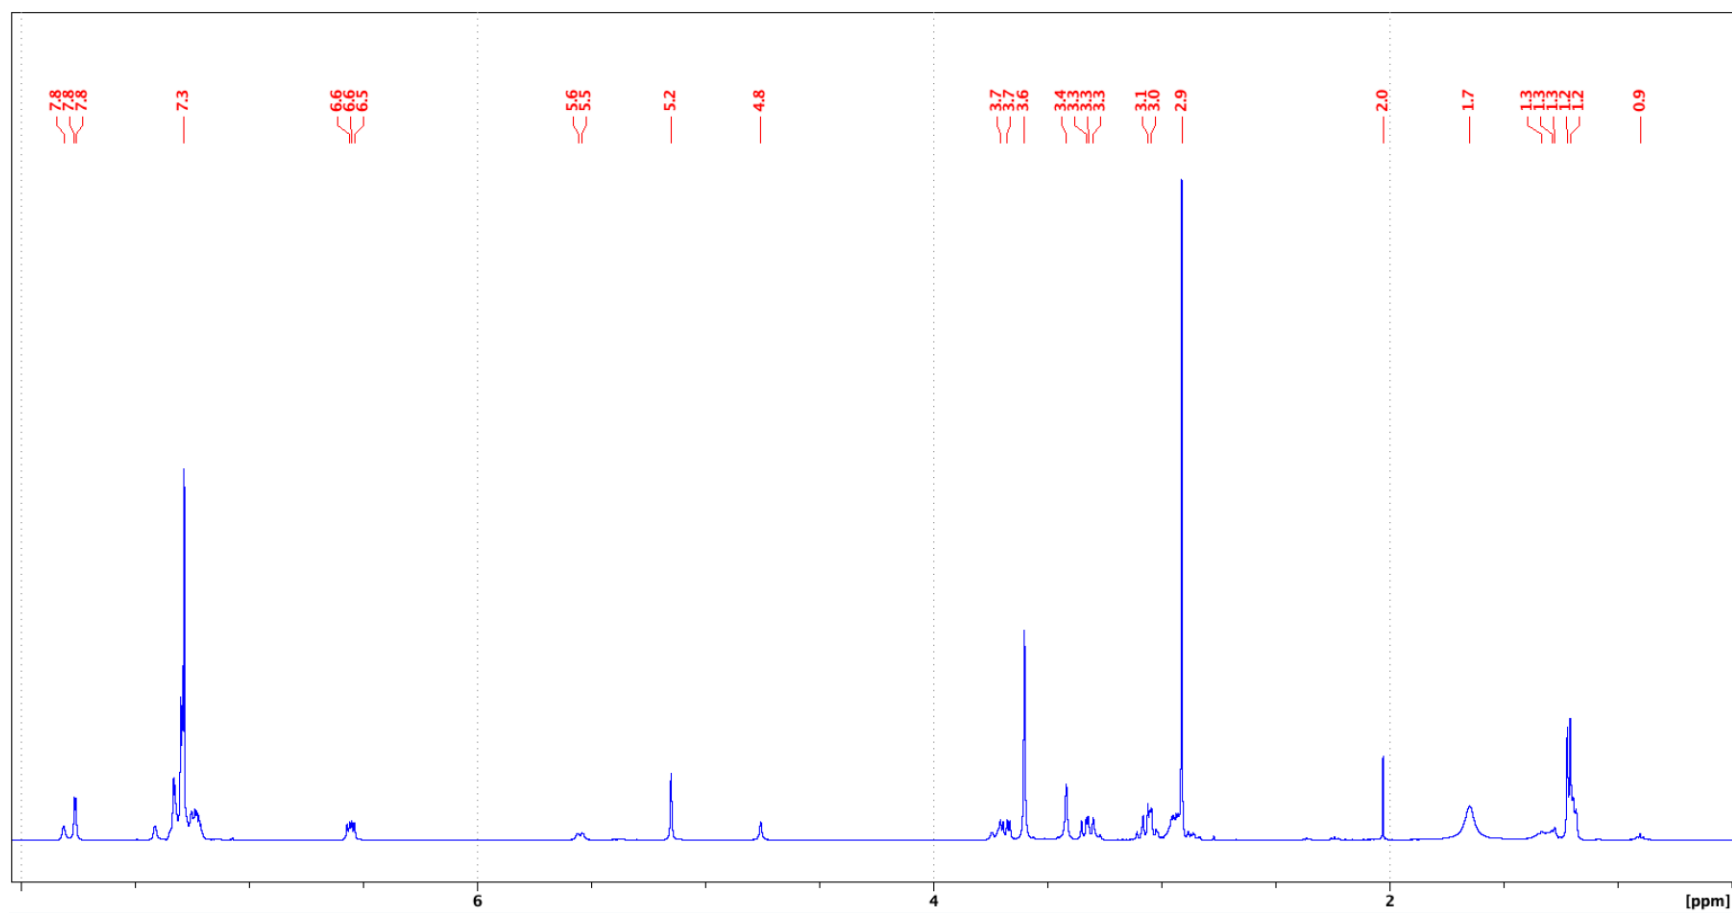

**Figure S1.** <sup>1</sup>H NMR spectrum of barbamide (**1**) in CDCl<sub>3</sub> at 500 MHz

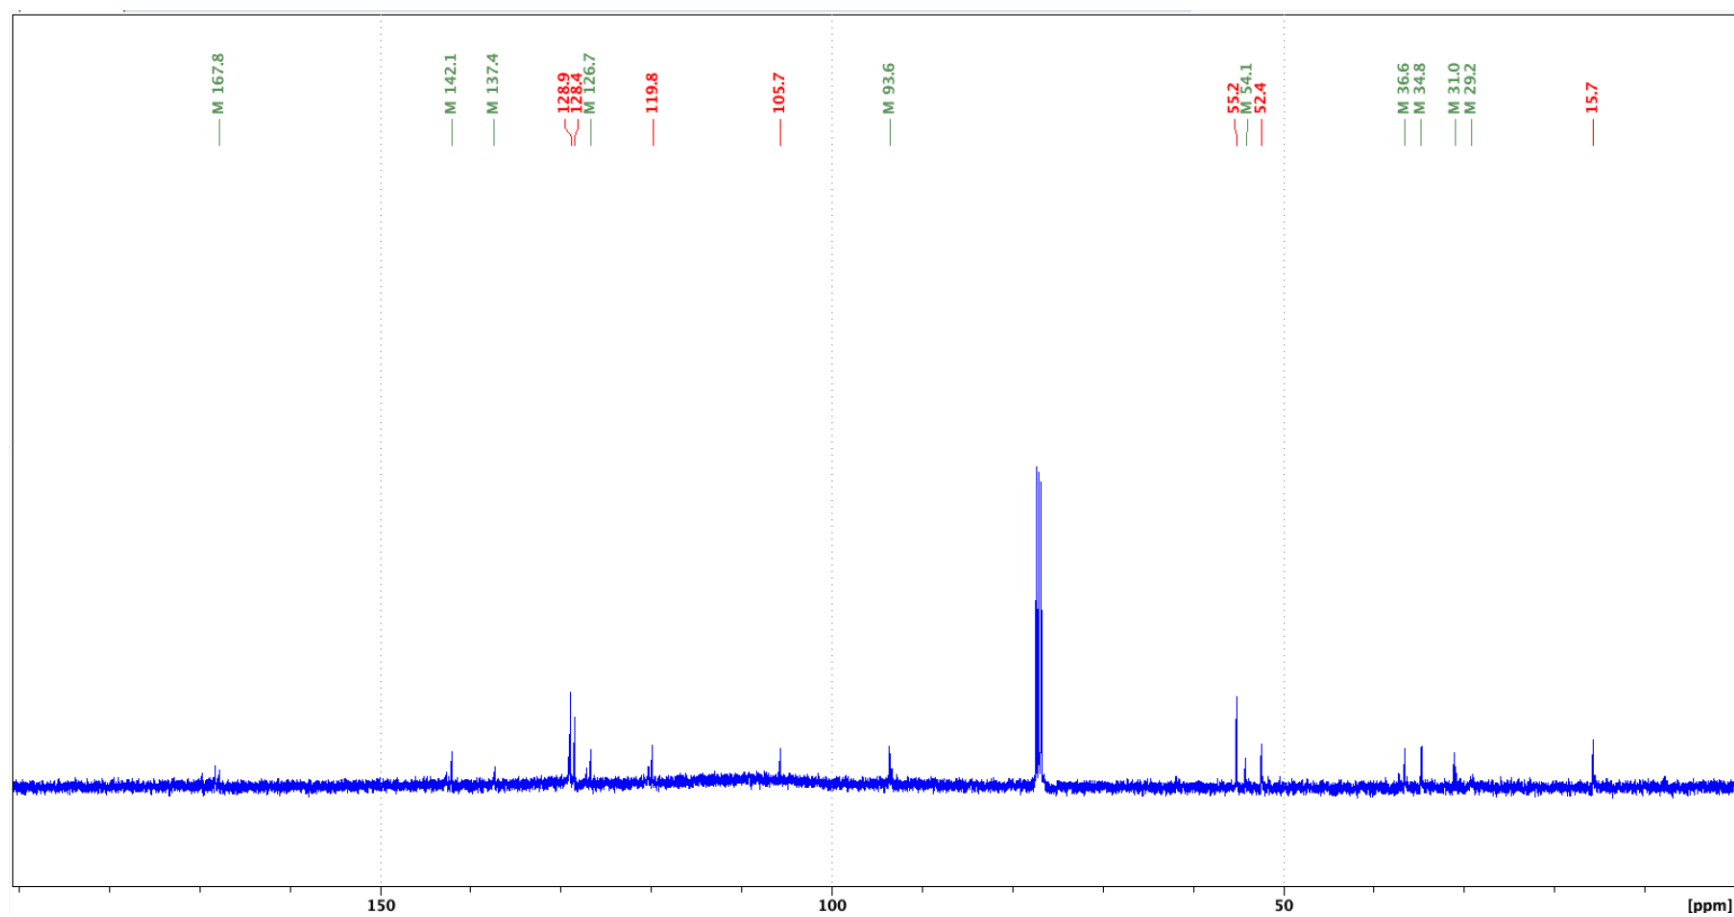

**Figure S2.** <sup>13</sup>C spectrum of barbamide (**1**) in CDCl<sub>3</sub> at 500 MHz

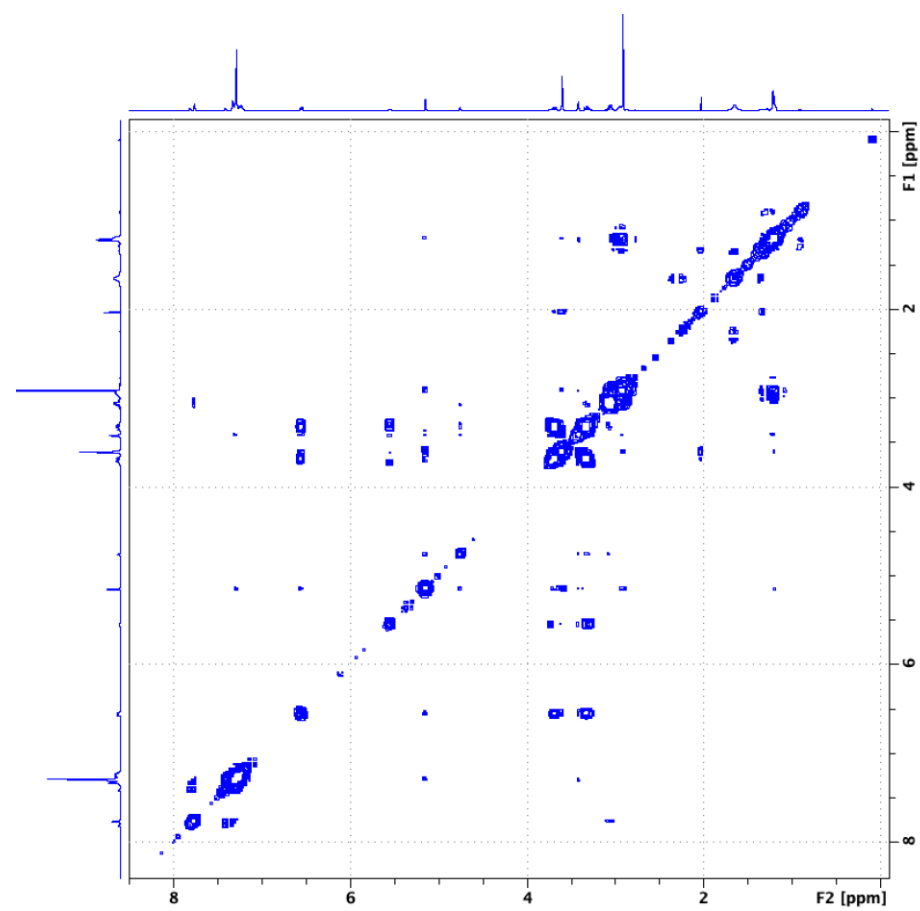

**Figure S3.** COSY spectrum of barbamide (**1**) in CDCl<sub>3</sub> at 500 MHz

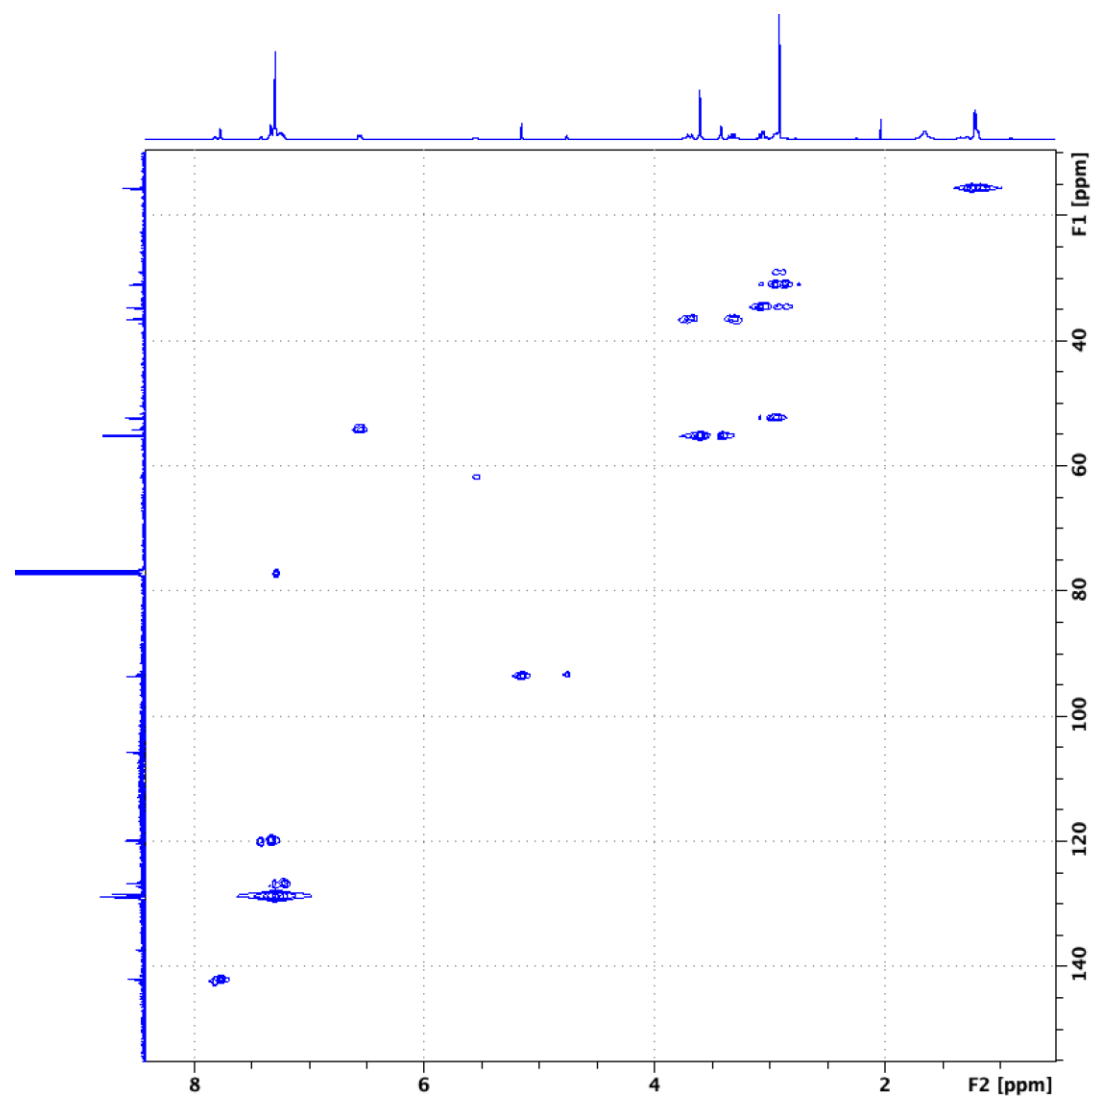

**Figure S4.** HSQC spectrum of barbamide (**1**) in CDCl<sub>3</sub> at 500 MHz

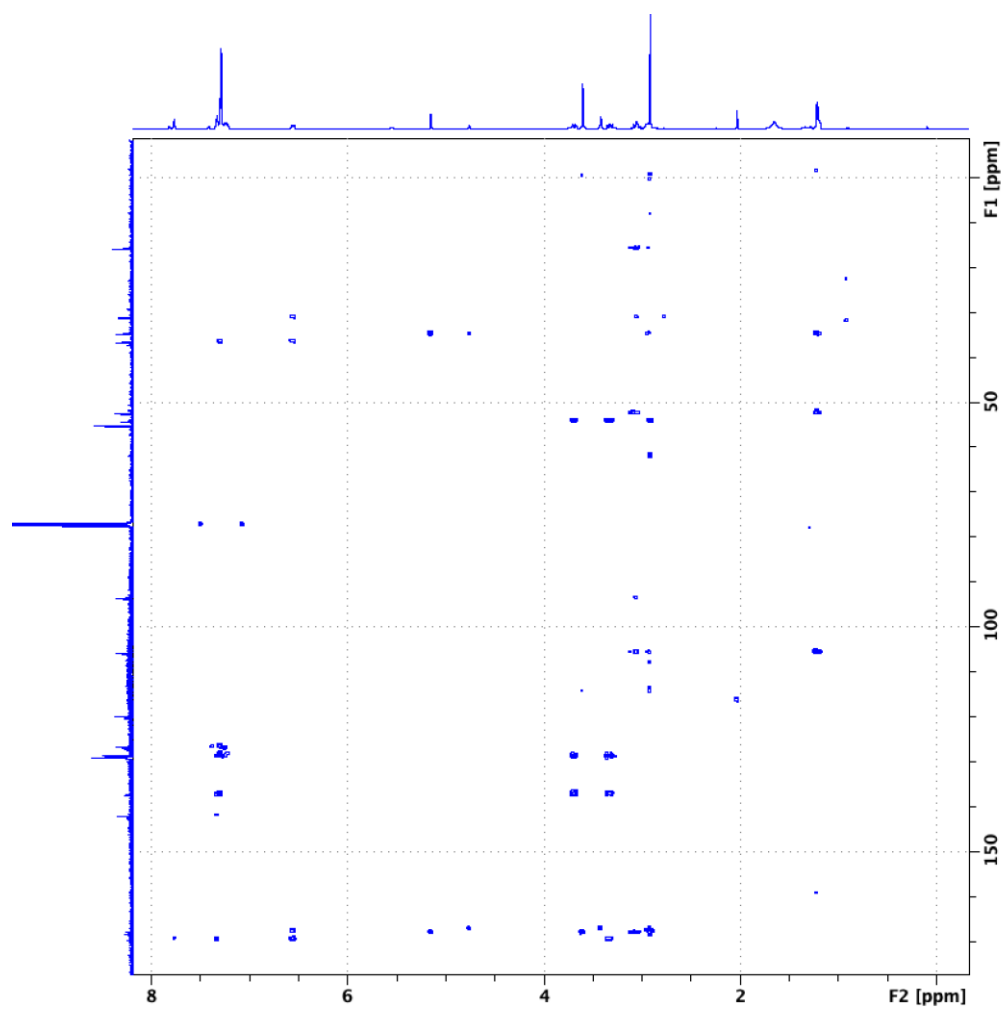

**Figure S5.** HMBC spectrum of barbamide (**1**) in CDCl<sub>3</sub> at 500 MHz
